# Supplementary material for: Long-term health in recipients of transplanted in vitro propagated spermatogonial stem cells
Source: PubMed Central journal article supplement — Hum Reprod. 2017 Nov 18;33(1):81–90. doi: 10.1093/humrep/dex348 (PMC5850721; doi:10.1093/humrep/dex348), 2017-11-18
Supplement: dex348suppl_figure2.pdf [file dex348suppl_figure2.pdf]

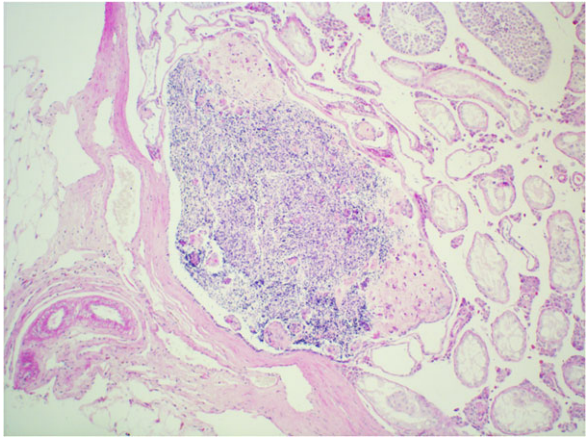

**Supplemental Figure S2** A testicular obstruction in a transplanted male. Transplanted testis of mouse 541561. Note the accumulation of spermatids in the rete testis.
